# Supplementary material for: Drug-induced atrial fibrillation: A real-world pharmacovigilance study using the US Food and Drug Administration Adverse Event Reporting System database
Source: Research Square preprint supplement (doi:10.21203/rs.3.rs-6622422/v1), 2025-06-13
Supplement: Supplementary file 1 [file 446b4038be0173ba018484ea.xlsx]

## Sheet: Sheet1
Class of drugs	Top 50 drugs in terms of number/drug name (indication)	Top 50 drugs in terms of ROR/drug name (indication)
drugs for the cardiovascular system	sacubitril/valsartan (chronic heart failure with reduced ejection fraction (HFrEF)), digoxin (heart failure, atrial fibrillation), dronedarone (atrial fibrillation), amiodarone (ventricular arrhythmia, atrial fibrillation), metoprolol (hypertension, angina pectoris, heart failure). bosentan (pulmonary arterial hypertension (PAH)),dofetilide (atrial fibrillation/flutter),macitentan (pulmonary arte…	ronedarone (atrial fibrillation/atrial flutter), propafenone (ventricular/supraventricular arrhythmia), digoxin (atrial fibrillation with rapid ventricular rate), dofetilide (atrial fibrillation/atrial flutter reversal), sotalol (ventricular/supraventricular arrhythmia), flecainide (ventricular arrhythmia). amiodarone (refractory arrhythmias), disopyramide (ventricular arrhythmias), metoprolol (a…
antitumor drugs	ibrutinib (chronic lymphocytic leukemia (CLL), mantle cell lymphoma (MCL)), daratumumab (multiple myeloma), carfilzomib (multiple myeloma), bendamustine (non-Hodgkin's lymphoma (NHL)), ponatinib (chronic myeloid leukemia (CML)). melphalan (multiple myeloma, ovarian cancer),obinutuzumab (chronic lymphocytic leukemia (CLL)),acalabrutinib (condylomatous lymphoma),pamidronate disodium (hypercalcemia,…	recombinant human interleukin-11 (thrombocytopenia after chemotherapy),aldesleukin (metastatic renal cell carcinoma),denileukin diftitox (cutaneous t-cell lymphoma),ibrutinib (b-cell malignancies),clofarabine (acute lymphoblastic leukemia), porfimer sodium (photodynamic therapy for esophageal cancer), daunorubicin (acute leukemia), zanubrutinib (condylomatous lymphoma), mosunetuzumab-axgb (non-Ho…
endocrine and metabolic diseases	rosiglitazone (type 2 diabetes), alendronate sodium (osteoporosis), ethyl icosapentate (hypertriglyceridemia), metformin/rosiglitazone (type 2 diabetes), spironolactone (hypertension, edema)	glimepiride/rosiglitazone (type 2 diabetes),rosiglitazone (insulin resistance),levothyroxine/liothyronine (hypothyroidism),thyroid tab (thyroid hormone replacement),omega-3-carboxylic acids (hypertriglyceridemia) ethyl Icosapentate (hypertriglyceridemia)
other drugs	bamlanivimab (COVID-19),efgartigimod alfa (myasthenia gravis),agalsidase beta (Fabry disease),theophylline (asthma, chronic obstructive pulmonary disease (COPD)),sevoflurane (general anesthesia),tafamidis (trans thyroxine protein amyloidosis (ATTR-CM)),furosemide (edema (heart failure, nephrotic syndrome))	gadoversetamide (MRI contrast), ixilan (CT contrast), ferric hydroxide (iron deficiency), migalastat (Fabry disease), tafamidis (transthyretin amyloidosis), omaveloxolone (Friedreich's ataxia). alvimopan (postoperative bowel obstruction), eplantersen (transthyretin amyloidosis), belumosudil mesylate (chronic graft-versus-host disease), theophylline (asthma/copd), etoricoxib (osteoarthritis/rheuma…
Table 5.List of top 50 drugs by number and ROR strength by indication
