# Supplementary material for: Drug-induced atrial fibrillation: A real-world pharmacovigilance study using the US Food and Drug Administration Adverse Event Reporting System database
Source: Research Square preprint supplement (doi:10.21203/rs.3.rs-6622422/v1), 2025-06-13
Supplement: Supplementary file 2 [file 5dc1185a8d34a12fa84aecf5.xlsx]

## Sheet: Sheet1
Method	Formula	Threshold
ROR		a ≥ 3 ROR ≥ 3 95%CI (lower limit) > 1
PRR		a ≥ 3 PRR ≥ 2 95%CI (lower limit) > 1
BCPNN		IC025>0
EBGM		EBGM05>2
Table 1. Data mining methods and specific formulas
